# Supplementary material for: Control of crystal growth and thermoelectric properties of sputter-deposited BiTe thin films embedded with alumina nanoparticles
Source: Royal Society of Chemistry journal article supplement (doi:10.1039/c6ce02191c), 2016-01-01
Supplement: c6ce02191c1.pdf [file c6ce02191c1.pdf]

*Supporting Information for*

# **Control of crystal growth and thermoelectric properties of sputter-deposited BiTe thin films embedded with alumina nanoparticles**

*Byeong Geun Kim,<sup>‡</sup> Geonsik Son,<sup>‡</sup> and Soon-Mok Choi\**

School of Energy, Materials and Chemical Engineering, Korea University of Technology and Education,  
Cheonan 330-708, Korea

<sup>‡</sup> These authors contributed equally to this work.

\* To whom correspondence should be addressed. E-mail: [smchoi@koreatech.ac.kr](mailto:smchoi@koreatech.ac.kr) (S. -M. Choi)

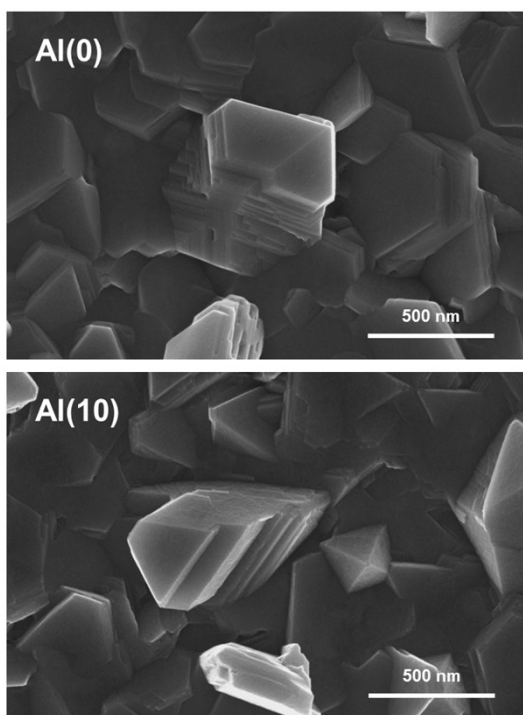

**Fig. S1** Surface FESEM images of Al(0) and Al(10)

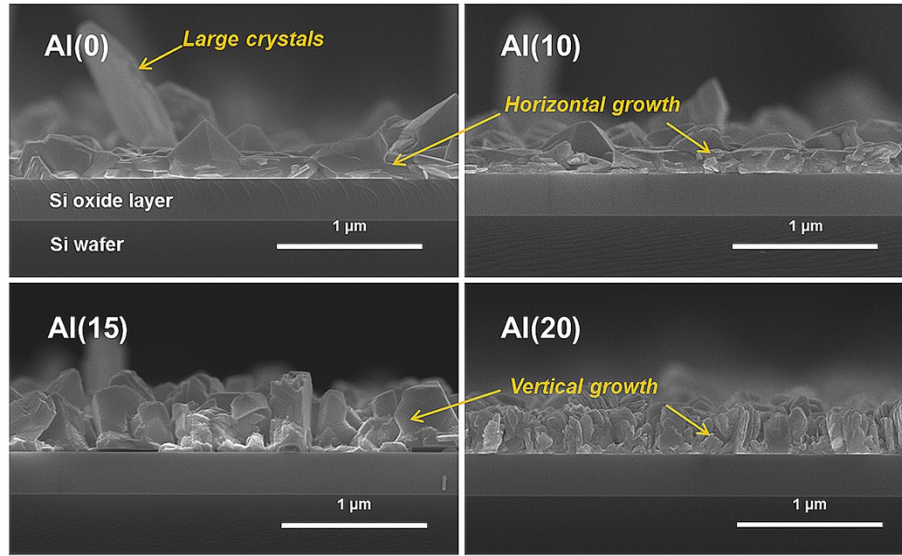

**Fig. S2** Cross-sectional FESEM images of BiTe thin films as a function of the applied DC power of Al target.

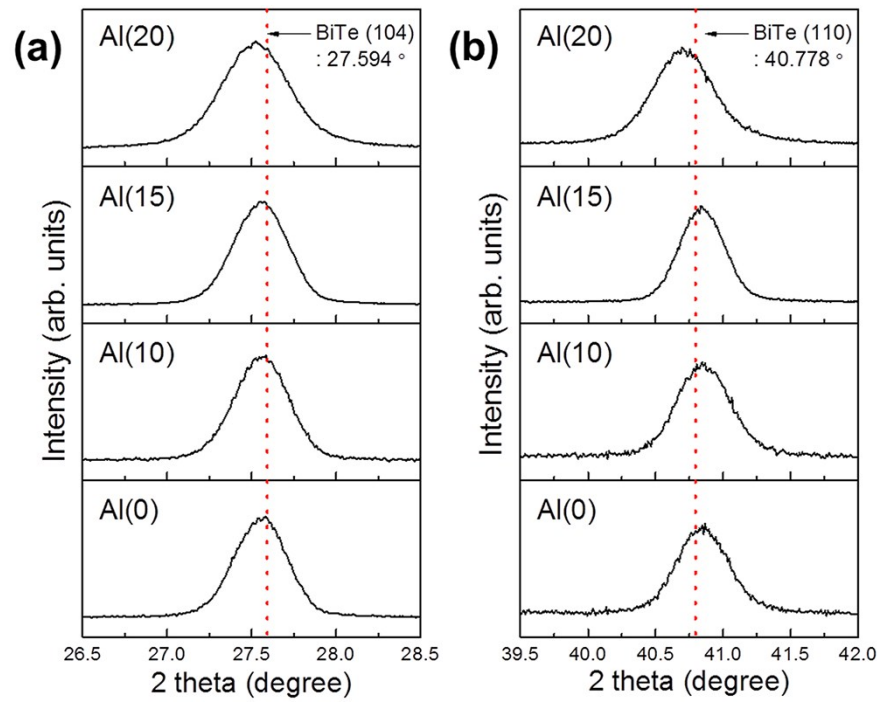

**Fig. S3** The enlarged XRD spectra of films deposited with different applied DC power of Al.

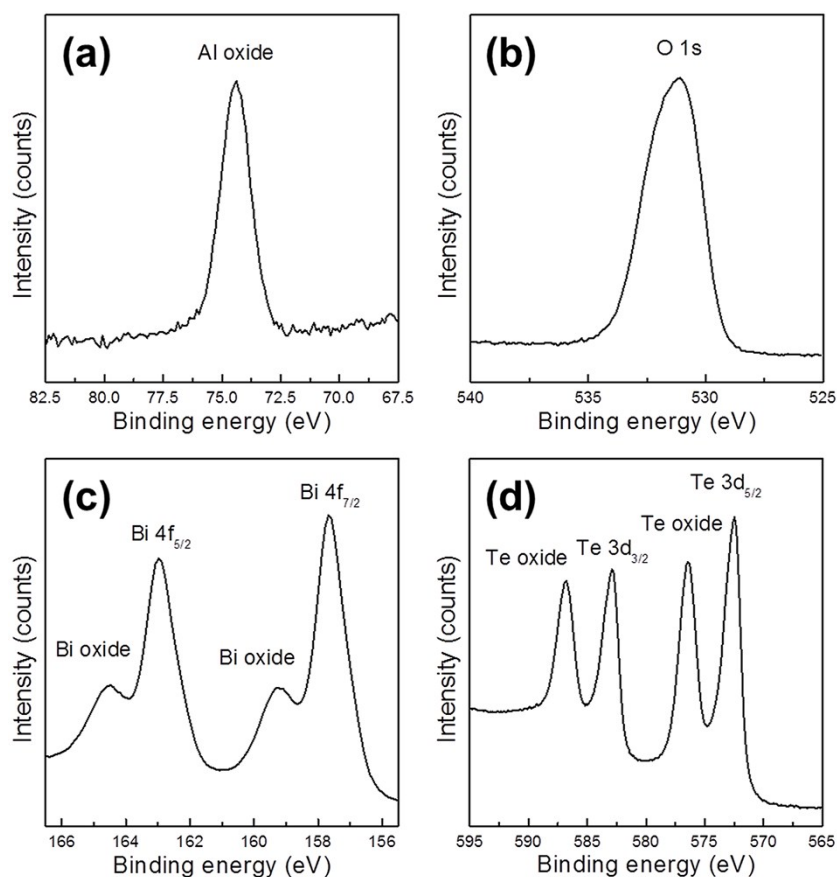

**Fig. S4** XPS spectra of each element in films before Ar ion etching: (a) Al, (b) O, (c) Bi, and (d) Te.

**Table 1.** Corresponding binding energies of elements in films before Ar ion etching

|                     | Al oxide | O 1s  | Bi 4f <sub>7/2</sub> | Bi oxide | Bi 4f <sub>5/2</sub> |
|---------------------|----------|-------|----------------------|----------|----------------------|
| Binding energy (eV) | 74.3     | 531.1 | 157.6                | 159.2    | 162.9                |

  

|                     | Bi oxide | Te 3d <sub>5/2</sub> | Te oxide | Te 3d <sub>3/2</sub> | Te oxide |
|---------------------|----------|----------------------|----------|----------------------|----------|
| Binding energy (eV) | 164.5    | 572.5                | 576.4    | 582.9                | 586.8    |
